# Supplementary material for: A nanozyme composite with high near-infrared photothermal ability for synergistic bacterial elimination
Source: Royal Society of Chemistry journal article supplement (doi:10.1039/d2qm01239a), 2023-01-01
Supplement: d2qm01239a1.pdf [file d2qm01239a1.pdf]

## Supporting Informations

### **Nanozyme Composite with High Near-Infrared Photothermal Ability for Synergistic Bacterial Elimination**

Jing Liu,<sup>\*a</sup> Ruke Wang,<sup>a</sup> Fenfen Zhai,<sup>a</sup> Wengan Zhang<sup>a</sup>, Bo Wang<sup>\*a</sup> and Hong Zhou<sup>\*b</sup>

*<sup>a</sup>College of Chemical and Biological Engineering, Shandong University of Science and Technology, Qingdao, 266590, PR China.*

*<sup>b</sup>Shandong Key Laboratory of Biochemical Analysis; College of Chemistry and Molecular Engineering, Qingdao University of Science and Technology, Qingdao 266042, China.*

*\*E-mail: jingliu@sdust.edu.cn (J. Liu); wb@sdust.edu.cn (B. Wang); zhouhong@qust.edu.cn (H. Zhou)*

## **Table of contents**

**Figure S1. Transmission electron microscopy (TEM) images of rGO-Au NFs S3**

**Figure S2. Comparison of photothermal conversion efficiency between Hemin-rGO@Au NFs, rGO@Au NFs and ultrapure water under irradiation with 808 nm laser. S4**

**Figure S3. Comparison of catalytic activity between Hemin-rGO@Au NFs and rGO@Au NFs. S5**

**Figure S4. The stability of Hemin-rGO@Au NFs in catalytic activity. S6**

**Figure S5. Catalytic activity changes of Hemin-rGO@Au NFs after irradiation treatment. S7**

**Figure S6. The toxicity of Hemin-rGO@Au NFs with different concentrations on normal cell lines (measured by CCK8 assay). S8**

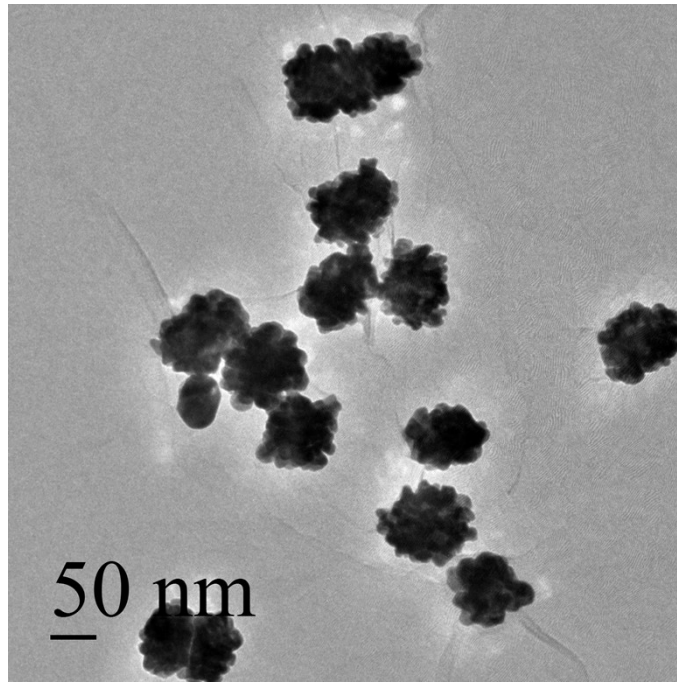

**Figure S1. Transmission electron microscopy (TEM) images of rGO-Au NFs.**

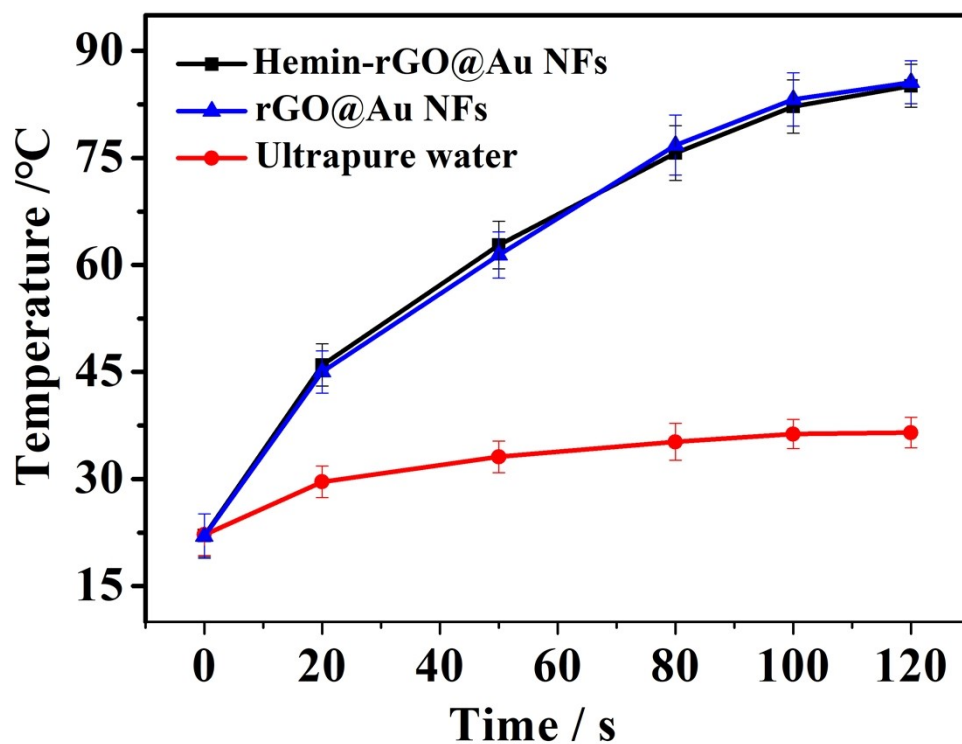

**Figure S2. Comparison of photothermal conversion efficiency between Hemin-rGO@Au NFs, rGO@Au NFs and ultrapure water under irradiation with 808 nm laser.**

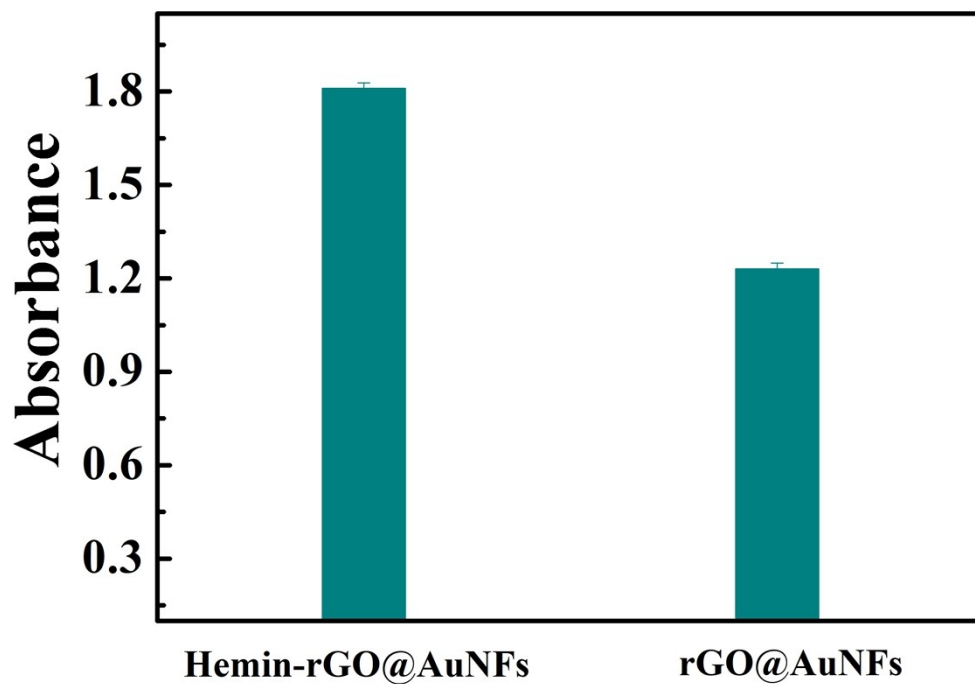

**Figure S3. Comparison of catalytic activity between Hemin-rGO@Au NFs and rGO@Au NFs.**

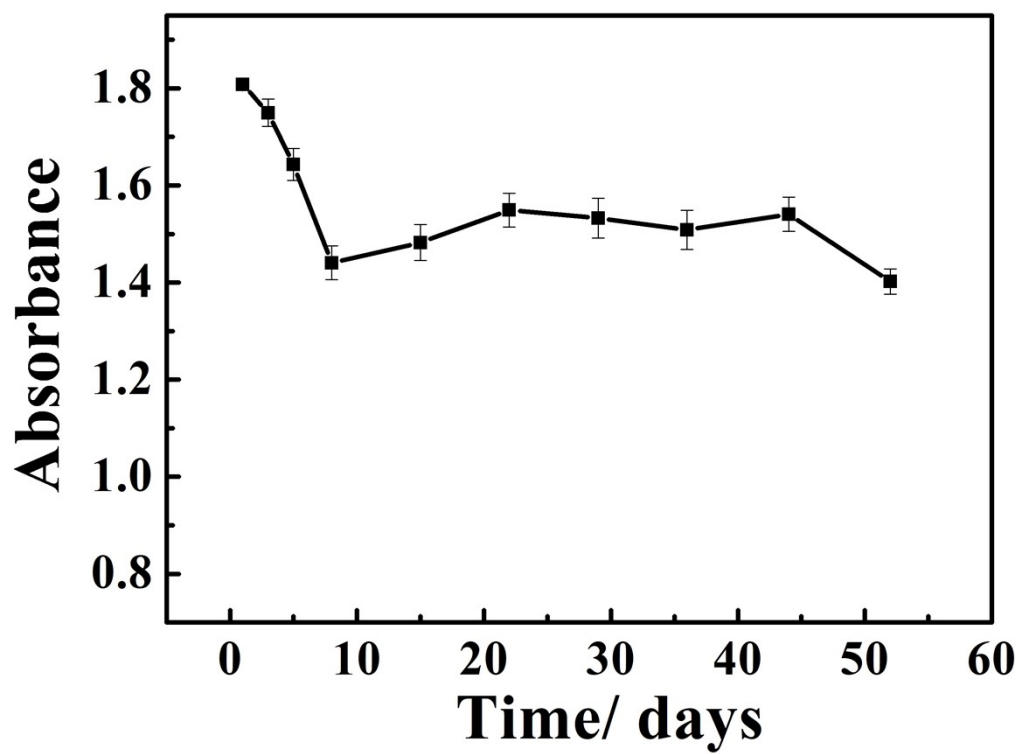

Figure S4. The stability of Hemin-rGO@Au NFs in catalytic activity.

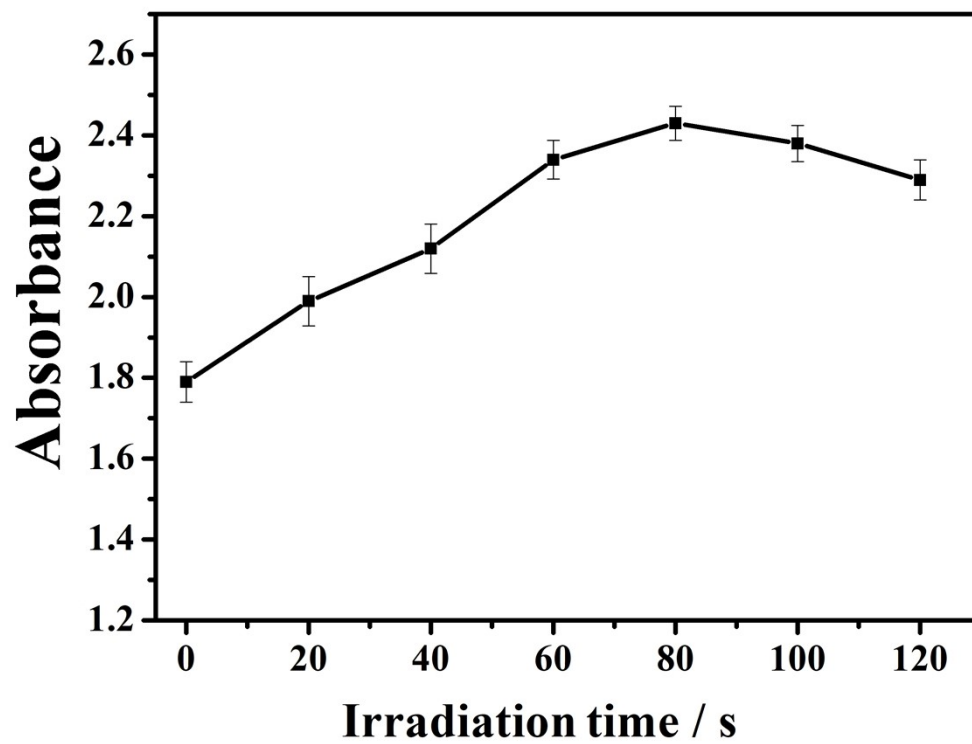

**Figure S5. Catalytic activity changes of Hemin-rGO@Au NFs after irradiation treatment.**

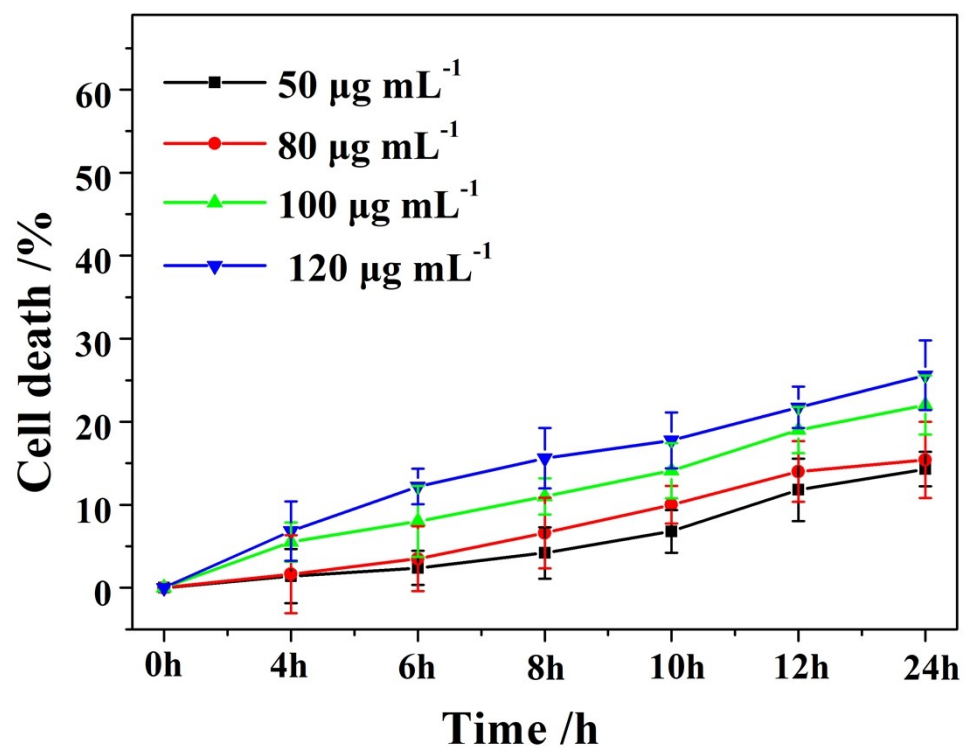

**Figure S6.** The toxicity of Hemin-rGO@Au NFs with different concentrations on normal cell lines (measured by CCK8 assay).
